# Supplementary material for: Associations between Global Burden of Disease dietary risk factors and elevated depressive symptoms: the NutriNet-Santé prospective cohort study
Source: Research Square preprint supplement (doi:10.21203/rs.3.rs-7873685/v1), 2025-11-03
Supplement: Supplementary file 1 [file 7ab74e76f31fcc2b11b6bfb9.docx]

**Figure S1. Flow chart of selection of NutriNet-Santé study participants included in the main analysis**

**
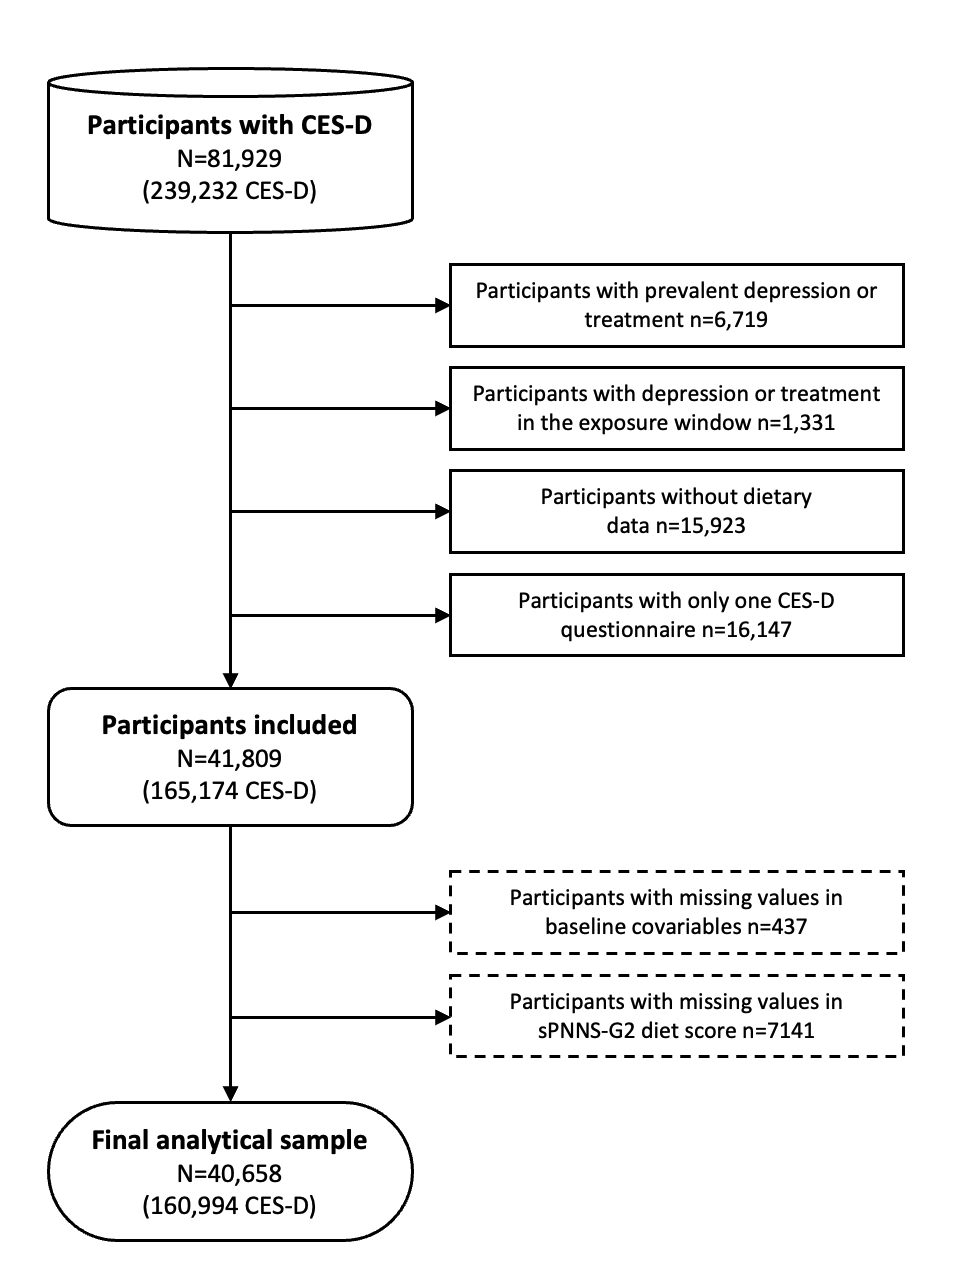
**

**Table S1. Dietary risk factors definition and dietary exposures units used in the analyses**

| **Dietary exposures** | **Theoretical minimum risk exposure levels (TMRELs) *** | **Units used in main analysis** | **Units used in GLAD analysis** |
| --- | --- | --- | --- |
| **Food groups** | | | |
| Fruits | Diet low in fruits (<310-340g) | 100g/day | 1g/day |
| Vegetables | Diet low in vegetables (<280-320g) | 100g/day | 1g/day |
| Legumes | Diet low in legumes (<90-100g) | 10g/day | 1g/day |
| Whole grains | Diet low in whole grains (<140-160g) | 10g/day | 1g/day |
| Nuts and seeds | Diet low in nuts and seeds (<10-19g) | 10g/day | 1g/day |
| Milk | Diet low in milk (<360-500g) | 100g/day | 1g/day |
| Red meat | Any intake of red meat (g) | 10g/day | 1g/day |
| Processed meat | Any intake of processed meat (g) | 10g/day | 1g/day |
| Sweet drinks a | Any intake of sweet drinks (g) | 100g/day | 1g/day |
| Ultra-processed food b | Any intake of ultra-processed foods (%) | 10%g/day | 1%g/day |
| **Nutrients** | | | |
| Fiber | Diet low in fiber (<21-22g) | 5g/day | 1g/day |
| Calcium | Diet low in calcium (<1.06-1.1g) | 100mg/day | 1g/day |
| Omega 3 c | Diet low in omega 3 (<430-470mg) | 100mg/day | 1mg/day |
| PUFA | Diet low in PUFA (<7-9%) | 1%kcal/day | 1%kcal/day |
| Sodium d | Diet high in sodium (>1-5g) | 100mg/day | 1g/day |

* Based on the 2019 GBD study

1. Beverages with ≥50 kcal per 226.8g serving
2. NOVA classification
3. EPA and DHA
4. Sodium from diet

**Table S2. Associations from GEE logistic regression models (ORs and 95% CI) between dietary exposures and elevated depressive symptoms (CES-D ≥23 for women and ≥17 for men) using GLAD units (N=40,658)**

| **Dietary exposures (unit)** | **Models** | **All (N=40,658)** | **Women (N=30,798)** | **Men (N=9,860)** |
| --- | --- | --- | --- | --- |
| Fruits (1g/day) | Model 1 a | 0.99907 (0.99885-0.99929) **‡ | 0.99870 (0.99841-0.99899) **‡ | 0.99929 (0.99896-0.99963) **‡ |
| Model 2 b | 0.99944 (0.99922-0.99966) **‡ | 0.99930 (0.99901-0.99959) **‡ | 0.99962 (0.99930-0.99995) * |
| Vegetables (1g/day) | Model 1 a | 0.99840 (0.99808-0.99872) **‡ | 0.99818 (0.99776-0.9986) **‡ | 0.99858 (0.99810-0.99905) **‡ |
| Model 2 b | 0.99892 (0.99861-0.99924) **‡ | 0.99892 (0.99850-0.99934) **‡ | 0.99894 (0.99848-0.99941) **‡ |
| Legumes (1g/day) | Model 1 a | 0.99924 (0.99788-1.00059) | 0.99818 (0.9963-1.00005) | 0.99910 (0.99713-1.00107) |
| Model 2 b | 0.99890 (0.99757-1.00022) | 0.99888 (0.99707-1.00069) | 0.99899 (0.99705-1.00093) |
| Whole grains (1g/day) | Model 1 a | 0.99883 (0.99814-0.99953) *‡ | 0.99822 (0.99731-0.99914) **‡ | 0.99882 (0.99783-0.99981) *‡ |
| Model 2 b | 0.99929 (0.99862-0.99995) * | 0.99932 (0.99844-1.00021) | 0.99924 (0.99826-1.00023) |
| Nuts and seeds (1g/day) | Model 1 a | 0.99330 (0.99031-0.99630) **‡ | 0.99088 (0.98677-0.99501) **‡ | 0.99388 (0.98956-0.99822) *‡ |
| Model 2 b | 0.99537 (0.99254-0.99822) *‡ | 0.99539 (0.99154-0.99925) *‡ | 0.99538 (0.99122-0.99955) * |
| Milk (1g/day) | Model 1 a | 1.00023 (1.00002-1.00044) *‡ | 1.00028 (1.00003-1.00052) *‡ | 0.99994 (0.99956-1.00032) |
| Model 2 b | 0.99994 (0.99973-1.00016) | 0.99998 (0.99972-1.00024) | 0.99987 (0.99949-1.00025) |
| Red meat (1g/day) | Model 1 a | 1.00167 (1.00089-1.00246) **‡ | 1.0004 (0.99937-1.00144) | 1.00078 (0.99952-1.00204) |
| Model 2 b | 1.00057 (0.99977-1.00136) | 1.00055 (0.99953-1.00158) | 1.00064 (0.99939-1.00189) |
| Processed meat (1g/day) | Model 1 a | 1.00296 (1.00196-1.00396) **‡ | 1.00243 (1.00111-1.00374) **‡ | 1.00094 (0.99932-1.00256) |
| Model 2 b | 1.00045 (0.99940-1.00149) | 1.00096 (0.99962-1.00230) | 0.99991 (0.99827-1.00156) |
| Sweet drinks (1g/day) | Model 1 a | 1.00143 (1.00115-1.00172) **‡ | 1.00167 (1.00132-1.00201) **‡ | 1.00092 (1.00047-1.00138) **‡ |
| Model 2 b | 1.00062 (1.00033-1.00091) **‡ | 1.00081 (1.00045-1.00118) **‡ | 1.00038 (0.99992-1.00084) |
| Ultra-processed food (1%g/day) | Model 1 a | 1.02737 (1.02451-1.03024) **‡ | 1.02851 (1.0252-1.03182) **‡ | 1.02459 (1.01896-1.03025) **‡ |
| Model 2 b | 1.01980 (1.01679-1.02282) **‡ | 1.02033 (1.01684-1.02382) **‡ | 1.01831 (1.01245-1.02420) **‡ |
| Fiber (1g/day) | Model 1 a | 0.98592 (0.98150-0.99036) **‡ | 0.97454 (0.9686-0.98051) **‡ | 0.98287 (0.97571-0.99008) **‡ |
| Model 2 b | 0.98655 (0.98201-0.99111) **‡ | 0.98581 (0.97990-0.99175) **‡ | 0.98772 (0.98068-0.99482) **‡ |
| Calcium (1g/day) | Model 1 a | 0.96576 (0.87431-1.06676) | 0.84275 (0.74125-0.95816) *‡ | 0.83102 (0.70345-0.98172) *‡ |
| Model 2 b | 0.85490 (0.77259-0.94598) *‡ | 0.89191 (0.78555-1.01268) | 0.81039 (0.68618-0.95708) *‡ |
| Omega 3 (1mg/day) | Model 1 a | 0.99981 (0.99971-0.99991) **‡ | 0.99966 (0.99953-0.99978) **‡ | 0.99986 (0.99970-1.00002) |
| Model 2 b | 0.99989 (0.99979-0.99999) *‡ | 0.99984 (0.99972-0.99996) *‡ | 0.99996 (0.99980-1.00011) |
| PUFA (1%kcal/day) | Model 1 a | 0.98969 (0.97408-1.00556) | 0.99089 (0.97179-1.01036) | 0.98963 (0.96344-1.01653) |
| Model 2 b | 1.00563 (0.98975-1.02175) | 1.00930 (0.98977-1.02922) | 0.99874 (0.97182-1.02640) |
| Sodium (1g/day) | Model 1 a | 0.99713 (0.96513-1.03019) | 0.89238 (0.85191-0.93479) **‡ | 0.91994 (0.86967-0.97311) *‡ |
| Model 2 b | 0.91255 (0.88039-0.94589) **‡ | 0.91024 (0.86890-0.95356) **‡ | 0.91859 (0.86866-0.97139) *‡ |

* p-value <0.05, ** p-value <0.001, ‡ Significant after Simes (Benjamini–Hochberg) correction for multiple comparisons

1. Model 1: Crude (no covariate)
2. Model 2: Model 1 + Sex (*women, men*) + Age (*continuous*) + Education (*no high school diploma, high school, university level*)

**Table S3. Associations from GEE logistic regression models (ORs and 95% CI) between dietary exposures adjusted by energy intake and elevated depressive symptoms (CES-D ≥23 for women and ≥17 for men) using GLAD units (N=40,658)**

| **Dietary exposures (unit)** | **Models** | **All (N=40,658)** | **Women (N=30,798)** | **Men (N=9,860)** |
| --- | --- | --- | --- | --- |
| Fruits (1g/day) | Model 1 a | 0.99901 (0.99878-0.99923) ** ‡ | 0.99877 (0.99848-0.99906) ** ‡ | 0.99937 (0.99904-0.99969) ** ‡ |
| Model 2 b | 0.99953 (0.99932-0.99975) ** ‡ | 0.99939 (0.99910-0.99968) ** ‡ | 0.99973 (0.99941-1.00005) |
| Vegetables (1g/day) | Model 1 a | 0.99832 (0.99799-0.99864) ** ‡ | 0.99823 (0.99781-0.99865) ** ‡ | 0.99867 (0.99820-0.99914) ** ‡ |
| Model 2 b | 0.99902 (0.99870-0.99934) ** ‡ | 0.99900 (0.99858-0.99942) ** ‡ | 0.99907 (0.99861-0.99953) ** ‡ |
| Legumes (1g/day) | Model 1 a | 0.99909 (0.99772-1.00046) | 0.99852 (0.99669-1.00036) | 0.99943 (0.99751-1.00136) |
| Model 2 b | 0.99929 (0.99800-1.00059) | 0.99925 (0.99749-1.00102) | 0.99940 (0.99751-1.00128) |
| Whole grains (1g/day) | Model 1 a | 0.99874 (0.99804-0.99944) ** ‡ | 0.99843 (0.99753-0.99933) ** ‡ | 0.99898 (0.99801-0.99995) * |
| Model 2 b | 0.99950 (0.99886-1.00015) | 0.99955 (0.99868-1.00042) | 0.99944 (0.99848-1.00040) |
| Nuts and seeds (1g/day) | Model 1 a | 0.99248 (0.98942-0.99555) ** ‡ | 0.99209 (0.98813-0.99607) ** ‡ | 0.99509 (0.99102-0.99917) * ‡ |
| Model 2 b | 0.99687 (0.99419-0.99956) * ‡ | 0.99681 (0.99311-1.00052) | 0.99690 (0.99303-1.00078) |
| Milk (1g/day) | Model 1 a | 1.00021 (1.00000-1.00042) | 1.00035 (1.00011-1.00060) * ‡ | 1.00004 (0.99966-1.00042) |
| Model 2 b | 1.00004 (0.99983-1.00025) | 1.00006 (0.99981-1.00032) | 0.99999 (0.99961-1.00037) |
| Red meat (1g/day) | Model 1 a | 1.00161 (1.00080-1.00243) ** ‡ | 1.00086 (0.99983-1.00189) | 1.00125 (0.99997-1.00253) |
| Model 2 b | 1.00111 (1.00031-1.00191) * ‡ | 1.00106 (1.00004-1.00209) * | 1.00121 (0.99995-1.00247) |
| Processed meat (1g/day) | Model 1 a | 1.00298 (1.00191-1.00405) ** ‡ | 1.00329 (1.00197-1.00462) ** ‡ | 1.00174 (1.00007-1.00341) * |
| Model 2 b | 1.00135 (1.00030-1.00241) * ‡ | 1.00184 (1.00049-1.00320) * ‡ | 1.00081 (0.99913-1.00249) |
| Sweet drinks (1g/day) | Model 1 a | 1.00144 (1.00114-1.00173) ** ‡ | 1.00178 (1.00143-1.00213) ** ‡ | 1.00103 (1.00057-1.00150) ** ‡ |
| Model 2 b | 1.00075 (1.00046-1.00103) ** ‡ | 1.00093 (1.00057-1.00129) ** ‡ | 1.00051 (1.00005-1.00097) * |
| Ultra-processed food (1%g/day) | Model 1 a | 1.02729 (1.02443-1.03017) ** ‡ | 1.02891 (1.02562-1.03222) ** ‡ | 1.02522 (1.01959-1.03088) ** ‡ |
| Model 2 b | 1.02034 (1.01734-1.02336) ** ‡ | 1.02076 (1.01729-1.02425) ** ‡ | 1.01907 (1.01323-1.02495) ** ‡ |
| Fiber (1g/day) | Model 1 a | 0.97813 (0.97295-0.98334) ** ‡ | 0.97409 (0.96739-0.98084) ** ‡ | 0.98455 (0.97696-0.99219) ** ‡ |
| Model 2 b | 0.99047 (0.98548-0.99548) ** ‡ | 0.98903 (0.98238-0.99573) * ‡ | 0.99234 (0.98483-0.99991) * |
| Calcium (1g/day) | Model 1 a | 0.87871 (0.77628-0.99465) * | 0.93930 (0.80995-1.08932) | 0.93749 (0.76223-1.15305) |
| Model 2 b | 1.00126 (0.88816-1.12875) | 1.03552 (0.89448-1.19880) | 0.95170 (0.77447-1.16950) |
| Omega 3 (1mg/day) | Model 1 a | 0.99980 (0.99970-0.99990) ** ‡ | 0.99968 (0.99956-0.99981) ** ‡ | 0.99988 (0.99973-1.00004) |
| Model 2 b | 0.99992 (0.99982-1.00001) | 0.99987 (0.99975-0.99999) * | 0.99999 (0.99984-1.00014) |
| PUFA (1%kcal/day) | Model 1 a | 0.98931 (0.97370-1.00517) | 0.99173 (0.97266-1.01117) | 0.99083 (0.96473-1.01763) |
| Model 2 b | 1.00682 (0.99098-1.02291) | 1.01028 (0.99078-1.03017) | 1.00027 (0.97345-1.02783) |
| Sodium (1g/day) | Model 1 a | 0.95310 (0.90954-0.99874) * | 0.91536 (0.86311-0.97078) * ‡ | 0.95601 (0.88891-1.02817) |
| Model 2 b | 0.96538 (0.92212-1.01066) | 0.95721 (0.90233-1.01543) | 0.97844 (0.91022-1.05179) |

* p-value <0.05, ** p-value <0.001, ‡ Significant after Simes (Benjamini–Hochberg) correction for multiple comparisons

1. Model 1: Dietary exposure is energy adjusted. No covariate
2. Model 2: Model 1 + Sex (*women, men*) + Age (*continuous*) + Education (*no high school diploma, high school, university level*)

**Table S4. SA-1: Associations from GEE logistic regression Model 2 (ORs and 95% CI) between dietary exposures and elevated depressive symptoms adjusting for baseline BMI (N=40,658)**

| **Dietary exposures a** | **All (N=40,658)** | **Women (N=30,798)** | **Men (N=9,860)** |
| --- | --- | --- | --- |
| **Food groups (unit)** | | | |
| Fruits (100g/day) | 0.972 (0.951-0.993) *‡ | 0.960 (0.933-0.988) *‡ | 0.984 (0.952-1.017) |
| Vegetables (100g/day) | 0.918 (0.890-0.947) **‡ | 0.921 (0.884-0.959) **‡ | 0.913 (0.871-0.956) **‡ |
| Legumes (10g/day) | 0.992 (0.979-1.005) | 0.992 (0.975-1.009) | 0.993 (0.975-1.012) |
| Whole grains (10g/day) | 0.997 (0.991-1.003) | 0.997 (0.989-1.006) | 0.997 (0.987-1.006) |
| Nuts and seeds (10g/day) | 0.983 (0.958-1.009) | 0.985 (0.951-1.021) | 0.978 (0.941-1.017) |
| Milk (100g/day) | 0.993 (0.972-1.015) | 0.990 (0.964-1.016) | 0.997 (0.958-1.036) |
| Red meat (10g/day) | 1.006 (0.998-1.014) | 1.007 (0.996-1.017) | 1.006 (0.993-1.018) |
| Processed meat (10g/day) | 1.005 (0.994-1.016) | 1.009 (0.995-1.023) | 1.001 (0.984-1.018) |
| Sweet drinks (100g/day) | 1.044 (1.015-1.074) *‡ | 1.056 (1.018-1.095) *‡ | 1.030 (0.983-1.079) |
| Ultra-processed food (10%g/day) | 1.155 (1.121-1.190) **‡ | 1.155 (1.115-1.196) **‡ | 1.156 (1.090-1.226) **‡ |
| **Nutrients (unit)** | | | |
| Fiber (5g/day) | 0.962 (0.937-0.987) *‡ | 0.958 (0.925-0.991) *‡ | 0.965 (0.926-1.006) |
| Calcium (100mg/day) | 0.999 (0.987-1.012) | 1.002 (0.987-1.016) | 0.997 (0.976-1.018) |
| Omega 3 (100mg/day) | 0.993 (0.984-1.003) | 0.990 (0.979-1.002) | 0.997 (0.982-1.012) |
| PUFA (1%kcal/day) | 0.999 (0.983-1.015) | 1.005 (0.985-1.024) | 0.987 (0.960-1.015) |
| Sodium (100mg/day) | 0.995 (0.991-1.000) * | 0.995 (0.989-1.001) | 0.995 (0.988-1.002) |

* p-value <0.05, ** p-value <0.001, ‡ Significant after Simes (Benjamini–Hochberg) correction for multiple comparisons

1. Model 2: Dietary exposure adjusted by energy intake + Sex (*women, men*) + Age (*continuous*) + Education (*no high school diploma, high school, university level*) + Smoking status (*non-smoker, occasional, former, permanent*) + Physical activity (*low, moderate, high, missing*) + Prevalent cardiovascular disease (*no, yes*) + Residence area (*rural, urban, outside France*) + Occupational category (*never employed/other activity, self-employed, employee, intermediate profession, managerial staff*) + Income per unit of consumption *(<1200€, 1200–2300€, 2300–3700€, >3700€, do not want to declare*) + Marital status (*living alone, living with a partner*) + Number of 24h records (*continuous*) + Alcohol (*continuous*) + **Baseline BMI** (*continuous*)

**Table S5. SA-2: Associations from GEE logistic regression Model 2 (ORs and 95% CI) between dietary exposures and elevated depressive symptoms adjusting for new onset of self-reported treatment for depression (N=40,658)**

| **Dietary exposures a** | **All (N=40,658)** | **Women (N=30,798)** | **Men (N=9,860)** |
| --- | --- | --- | --- |
| **Food groups (unit)** | | | |
| Fruits (100g/day) | 0.972 (0.952-0.994) *‡ | 0.959 (0.932-0.987) *‡ | 0.987 (0.955-1.020) |
| Vegetables (100g/day) | 0.921 (0.893-0.950) **‡ | 0.923 (0.886-0.961) **‡ | 0.918 (0.877-0.962) **‡ |
| Legumes (10g/day) | 0.991 (0.979-1.004) | 0.992 (0.975-1.009) | 0.991 (0.973-1.010) |
| Whole grains (10g/day) | 0.997 (0.990-1.003) | 0.997 (0.989-1.006) | 0.996 (0.987-1.006) |
| Nuts and seeds (10g/day) | 0.979 (0.953-1.005) | 0.979 (0.944-1.015) | 0.978 (0.940-1.017) |
| Milk (100g/day) | 0.992 (0.971-1.014) | 0.992 (0.966-1.018) | 0.991 (0.953-1.031) |
| Red meat (10g/day) | 1.008 (1.000-1.016) | 1.008 (0.998-1.018) | 1.007 (0.995-1.020) |
| Processed meat (10g/day) | 1.007 (0.997-1.018) | 1.012 (0.998-1.025) | 1.003 (0.986-1.019) |
| Sweet drinks (100g/day) | 1.043 (1.014-1.073) *‡ | 1.051 (1.014-1.089) *‡ | 1.036 (0.989-1.085) |
| Ultra-processed food (10%g/day) | 1.147 (1.114-1.182) **‡ | 1.149 (1.110-1.189) **‡ | 1.146 (1.081-1.214) **‡ |
| **Nutrients (unit)** | | | |
| Fiber (5g/day) | 0.958 (0.934-0.984) *‡ | 0.951 (0.919-0.984) *‡ | 0.966 (0.928-1.007) |
| Calcium (100mg/day) | 1.000 (0.988-1.012) | 1.002 (0.987-1.016) | 0.997 (0.976-1.019) |
| Omega 3 (100mg/day) | 0.994 (0.984-1.003) | 0.989 (0.978-1.001) | 0.999 (0.984-1.014) |
| PUFA (1%kcal/day) | 1.000 (0.984-1.016) | 1.005 (0.986-1.025) | 0.988 (0.961-1.017) |
| Sodium (100mg/day) | 0.996 (0.991-1.000) | 0.996 (0.990-1.002) | 0.996 (0.989-1.003) |

* p-value <0.05, ** p-value <0.001, ‡ Significant after Simes (Benjamini–Hochberg) correction for multiple comparisons

1. Model 2: Dietary exposure adjusted by energy intake + Sex (*women, men*) + Age (*continuous*) + Education (*no high school diploma, high school, university level*) + Smoking status (*non-smoker, occasional, former, permanent*) + Physical activity (*low, moderate, high, missing*) + Prevalent cardiovascular disease (*no, yes*) + Residence area (*rural, urban, outside France*) + Occupational category (*never employed/other activity, self-employed, employee, intermediate profession, managerial staff*) + Income per unit of consumption *(<1200€, 1200–2300€, 2300–3700€, >3700€, do not want to declare*) + Marital status (*living alone, living with a partner*) + Number of 24h records (*continuous*) + Alcohol (*continuous*) + **New onset of self-reported treatment for depression** (*no, yes*)

**Table S6. SA-3: Characteristics of the NutriNet-Santé study participants included in sensitivity analysis 3 (N=36,618)**

|  | **Total** | **Women** | **Men** |
| --- | --- | --- | --- |
| ***Baseline*** | | | |
| Sex (n (%)) | 36,618 (100.0) | 28,030 (76.5) | 8,588 (23.5) |
| Age at baseline (mean (SD)) | 46.8 (14.3) | 45.1 (14.0) | 52.4 (13.8) |
| Educational level (n (%)) |  |  |  |
| No high school diploma | 6,649 (18.2) | 4,613 (16.5) | 2,036 (23.7) |
| High school diploma | 5,575 (15.2) | 4,540 (16.2) | 1,035 (12.1) |
| University level | 24,394 (66.6) | 18,877 (67.3) | 5,517 (64.2) |
| Marital status (n (%)) |  |  |  |
| Living alone | 8,862 (24.2) | 7,386 (26.4) | 1,476 (17.2) |
| Living with a partner | 27,756 (75.8) | 20,644 (73.6) | 7,112 (82.8) |
| Residence area (n (%)) |  |  |  |
| Rural | 7,889 (21.5) | 6,050 (21.6) | 1,839 (21.4) |
| Urban | 28,147 (76.9) | 21,512 (76.7) | 6,635 (77.3) |
| Outside France | 582 (1.6) | 468 (1.7) | 114 (1.3) |
| Occupational categories (n (%)) |  |  |  |
| Never employed/other activity | 1,284 (3.5) | 1,161 (4.1) | 123 (1.4) |
| Self-employed | 1,864 (5.1) | 1,184 (4.2) | 680 (7.9) |
| Employee | 8,746 (23.9) | 7,856 (28.0) | 890 (10.4) |
| Intermediate profession | 10,510 (28.7) | 8,419 (30.0) | 2,091 (24.3) |
| Managerial staff | 14,214 (38.8) | 9,410 (33.6) | 4,804 (55.9) |
| Monthly income per consumption unit (n (%)) |  |  |  |
| Less than 1200 euros | 4,415 (12.1) | 3,701 (13.2) | 714 (8.3) |
| 1200 – 2300 euros | 13,888 (37.9) | 10,821 (38.6) | 3,067 (35.7) |
| 2300 – 3700 euros | 10,141 (27.7) | 7,289 (26.0) | 2,852 (33.2) |
| More than 3700 euros | 4,533 (12.4) | 3,038 (10.8) | 1,495 (17.4) |
| Do not want to declare | 3,641 (9.9) | 3,181 (11.3) | 460 (5.4) |
| Smoking status (n (%)) |  |  |  |
| Non-smoker | 19,041 (52.0) | 15,424 (55.0) | 3,617 (42.1) |
| Occasional smoker | 1,551 (4.2) | 1,174 (4.2) | 377 (4.4) |
| Former smoker | 13,146 (35.9) | 9,134 (32.6) | 4,012 (46.7) |
| Permanent smoker | 2,880 (7.9) | 2,298 (8.2) | 582 (6.8) |
| BMI (mean (SD)) | 23.7 (4.2) | 23.3 (4.2) | 24.9 (3.6) |
| Physical activity (IPAQ) (n (%)) |  |  |  |
| Low activity levels | 11,598 (31.7) | 8,114 (28.9) | 3,484 (40.6) |
| Moderate activity levels | 14,188 (38.7) | 11,313 (40.4) | 2,875 (33.5) |
| High activity levels | 7,074 (19.3) | 5,562 (19.8) | 1,512 (17.6) |
| Missing | 3,758 (10.3) | 3,041 (10.8) | 717 (8.3) |
| Prevalent cardiovascular disease (n (%)) | 8,325 (22.7) | 5,407 (19.3) | 2,918 (34.0) |
| Type 2 diabetes | 777 (2.1) | 397 (1.4) | 380 (4.4) |
| Hypertension | 4,496 (12.3) | 2,708 (9.7) | 1,788 (20.8) |
| Dyslipidemia | 5,144 (14.0) | 3,339 (11.9) | 1,805 (21.0) |
| Other cardiovascular diseases | 813 (2.2) | 336 (1.2) | 477 (5.6) |
| ***Dietary exposure window (first 2 years)*** | | | |
| Number of 24h records during the exposure period (mean (SD)) | 7.7 (2.5) | 7.6 (2.5) | 7.8 (2.5) |
| Daily energy intake (kcal) (mean (SD)) | 1894.2 (452.3) | 1780.9 (376.7) | 2264.2 (480.2) |
| sPNNS-GS2 score (mean (SD)) | 2.0 (3.3) | 2.5 (3.1) | 0.3 (3.7) |
| Daily alcohol (g) (mean (SD)) | 8.5 (11.4) | 6.3 (8.4) | 15.6 (16.0) |
| Incident cardiovascular disease (n (%)) | 1,303 (3.6) | 612 (2.2) | 691 (8.0) |
| Type 2 diabetes | 617 (1.7) | 348 (1.2) | 269 (3.1) |
| Other cardiovascular diseases | 721 (2.0) | 272 (1.0) | 449 (5.2) |
| Incident self-reported treatment for depression (n (%)) | 1,238 (3.4) | 1,059 (3.8) | 179 (2.1) |
| ***Follow-up*** | | | |
| Number of completed CES-D questionnaires (n (%)) |  |  |  |
| 2 | 8,884 (24.3) | 7,178 (25.6) | 1,706 (19.9) |
| 3 | 6,343 (17.3) | 5,062 (18.1) | 1,281 (14.9) |
| 4 | 6,227 (17.0) | 4,813 (17.2) | 1,414 (16.5) |
| 5 | 7,197 (19.7) | 5,402 (19.3) | 1,795 (20.9) |
| 6 | 7,962 (21.7) | 5,571 (19.9) | 2,391 (27.8) |
| 7 | 5 (0.0) | 4 (0.0) | 1 (0.0) |
| Number of CES-D with elevated depressive symptoms (n (%)) |  |  |  |
| 0 | 31,919 (87.2) | 24,593 (87.7) | 7,326 (85.3) |
| At least one | 4,699 (12.8) | 3,437 (12.3) | 1,262 (14.7) |
| 1 | 3,359 (9.2) | 2,531 (9.0) | 828 (9.6) |
| 2 | 860 (2.4) | 598 (2.1) | 262 (3.1) |
| 3 | 313 (0.9) | 208 (0.7) | 105 (1.2) |
| 4 | 130 (0.4) | 81 (0.3) | 49 (0.6) |
| 5 | 37 (0.1) | 19 (0.1) | 18 (0.2) |

Abbreviations: BMI (Body Mass Index), IPAQ (International Physical Activity Questionnaire), sPNNS-GS2 (simplified Programme National Nutrition Santé-guidelines score 2), CES-D (Center for Epidemiologic Studies Depression)

**Table S7. SA- 3: Daily intake of dietary exposures and description of theoretical minimum risk exposure levels among participants included in sensitivity analysis 3 (N=36,618)**

|  |  | **Total (N=36,618)** | **Women (N=28,030)** | **Men (N=8,588)** | |
| --- | --- | --- | --- | --- | --- |
| **Food groups** | | | | |
| Fruits (g/day) | Mean daily intake (SD) | 212.7 (141.0) | 205.3 (132.3) | 236.9 (164.2) | |
| Less than 310g (n (%)) | 29,411 (80.3) | 23,052 (82.2) | 6,359 (74.0) | |
| Less than 340g (n (%)) | 31,122 (85.0) | 24,343 (86.8) | 6,779 (78.9) | |
| Vegetables (g/day) | Mean daily intake (SD) | 229.9 (106.6) | 227.2 (104.2) | 238.9 (113.3) | |
| Less than 280g (n (%)) | 26,728 (73.0) | 20,687 (73.8) | 6,041 (70.3) | |
| Less than 320g (n (%)) | 30,419 (83.1) | 23,534 (84.0) | 6,885 (80.2) | |
| Legumes (g/day) | Mean daily intake (SD) | 12.0 (20.6) | 11.2 (18.7) | 14.7 (25.5) | |
| Less than 90g (n (%)) | 36,241 (99.0) | 27,801 (99.2) | 8,440 (98.3) | |
| Less than 100g (n (%)) | 36,329 (99.2) | 27,858 (99.4) | 8,471 (98.6) | |
| Whole grains (g/day) | Mean daily intake (SD) | 36.5 (43.9) | 34.4 (38.8) | 43.1 (57.0) | |
| Less than 140g (n (%)) | 35,454 (96.8) | 27,427 (97.8) | 8,027 (93.5) | |
| Less than 160g (n (%)) | 35,849 (97.9) | 27,658 (98.7) | 8,191 (95.4) | |
| Nuts and seeds (g/day) | Mean daily intake (SD) | 5.2 (10.2) | 4.8 (9.4) | 6.3 (12.5) | |
| Less than 10g (n (%)) | 30,941 (84.5) | 23,985 (85.6) | 6,956 (81.0) | |
| Less than 19g (n (%)) | 34,133 (93.2) | 26,306 (93.8) | 7,827 (91.1) | |
| Milk (g/day) | Mean daily intake (SD) | 79.2 (116.4) | 76.1 (112.8) | 89.2 (127.1) | |
| Less than 360g (n (%)) | 35,354 (96.5) | 27,176 (97.0) | 8,178 (95.2) | |
| Less than 500g (n (%)) | 36,388 (99.4) | 27,872 (99.4) | 8,516 (99.2) | |
| Red meat (g/day) | Mean daily intake (SD) | 44.4 (33.8) | 40.6 (30.9) | 57.0 (39.2) | |
| Any intake (g) (n (%)) | 33,223 (90.7) | 25,260 (90.1) | 7,963 (92.7) | |
| Processed meat (g/day) | Mean daily intake (SD) | 30.5 (25.0) | 28.2 (22.6) | 38.1 (30.3) | |
| Any intake (g) (n (%)) | 34,072 (93.0) | 26,033 (92.9) | 8,039 (93.6) | |
| Sweet drinks (g/day) | Mean daily intake (SD) | 34.6 (74.7) | 33.3 (70.5) | 38.7 (86.7) | |
| Any intake (g) (n (%)) | 17,511 (47.8) | 13,437 (47.9) | 4,074 (47.4) | |
| Ultra-processed food (%g/day) | Mean daily intake (SD) | 15.3 (7.9) | 15.3 (7.9) | 15.3 (7.8) | |
| Any intake (g) (n (%)) | 36,613 (100.0) | 28,027 (100.0) | 8,586 (100.0) | |
| **Nutrients** | | | | |
| Fiber (g/day) | Mean daily intake (SD) | 20.1 (6.8) | 19.2 (6.2) | 23.03 (7.8) | |
| Less than 21g (n (%)) | 22,709 (62.0) | 18,860 (67.3) | 3,849 (44.8) | |
| Less than 22g (n (%)) | 24,810 (67.8) | 20,429 (72.9) | 4,381 (51.0) | |
| Calcium (g/day) | Mean daily intake (SD) | 0.9 (0.3) | 0.9 (0.3) | 1.03 (0.3) | |
| Less than 1.06g (n (%)) | 26,428 (72.2) | 21,426 (76.4) | 5,002 (58.2) | |
| Less than 1.1g (n (%)) | 28,004 (76.5) | 22,567 (80.5) | 5,437 (63.3) | |
| Omega 3 (mg/day) | Mean daily intake (SD) | 326.0 (304.6) | 309.5 (287.4) | 379.88 (349.6) | |
| Less than 430mg (n (%)) | 27,084 (74.0) | 21,270 (75.9) | 5,814 (67.7) | |
| Less than 470mg (n (%)) | 28,418 (77.6) | 22,266 (79.4) | 6,152 (71.6) | |
| PUFA (%kcal/day) | Mean daily intake (SD) | 5.6 (1.6) | 5.6 (1.6) | 5.55 (1.8) | |
| Less than 7% (n (%)) | 31,309 (85.5) | 23,965 (85.5) | 7,344 (85.5) | |
| Less than 9% (n (%)) | 35,357 (96.6) | 27,114 (96.7) | 8,243 (96.0) | |
| Sodium (g/day) | Mean daily intake (SD) | 2.7 (0.8) | 2.6 (0.7) | 3.30 (0.9) | |
| More than 1g (n (%)) | 36,502 (99.7) | 27,927 (99.6) | 8,575 (99.8) | |
| More than 5g (n (%)) | 538 (1.5) | 150 (0.5) | 388 (4.5) | |

**Table S8. SA-3: Associations from GEE logistic regression models (ORs and 95% CI) between food groups and elevated depressive symptoms (CES-D ≥23 for women and ≥17 for men) of sensitivity analysis 3 (N=36,618)**

| **Food groups (unit)** | **Models** | **All (N=36,618)** | **Women (N=28,030)** | **Men (N=8,588)** |
| --- | --- | --- | --- | --- |
| Fruits (100g/day) | Model 1 a | 0.957 (0.932-0.982) * | 0.951 (0.919-0.984) * | 0.966 (0.927-1.006) |
| **Model 2** b | 0.972 (0.946-0.998) * | 0.961 (0.929-0.994) * | 0.988 (0.947-1.029) |
| Model 3 c | 0.989 (0.962-1.018) | 0.985 (0.950-1.022) | 0.996 (0.954-1.041) |
| Vegetables (100g/day) | Model 1 a | 0.934 (0.900-0.968) ** | 0.927 (0.885-0.970) * | 0.950 (0.895-1.009) |
| **Model 2** b | 0.946 (0.913-0.981) * | 0.939 (0.898-0.983) * | 0.965 (0.908-1.024) |
| Model 3 c | 0.961 (0.926-0.998) * | 0.959 (0.916-1.005) | 0.972 (0.911-1.037) |
| Legumes (10g/day) | Model 1 a | 0.999 (0.983-1.014) | 0.994 (0.973-1.014) | 1.006 (0.983-1.030) |
| **Model 2** b | 0.998 (0.983-1.014) | 0.992 (0.972-1.012) | 1.008 (0.985-1.031) |
| Model 3 c | 1.004 (0.989-1.019) | 1.000 (0.980-1.020) | 1.011 (0.988-1.034) |
| Whole grains (10g/day) | Model 1 a | 0.995 (0.987-1.003) | 0.999 (0.989-1.010) | 0.990 (0.978-1.002) |
| **Model 2** b | 0.997 (0.989-1.005) | 1.000 (0.989-1.011) | 0.994 (0.982-1.007) |
| Model 3 c | 1.002 (0.994-1.011) | 1.007 (0.997-1.018) | 0.996 (0.983-1.010) |
| Nuts and seeds (10g/day) | Model 1 a | 0.990 (0.958-1.023) | 0.992 (0.951-1.036) | 0.987 (0.938-1.039) |
| **Model 2** b | 0.998 (0.966-1.030) | 1.000 (0.959-1.043) | 0.997 (0.947-1.049) |
| Model 3 c | 1.013 (0.982-1.046) | 1.022 (0.981-1.065) | 1.005 (0.954-1.058) |
| Milk (100g/day) | Model 1 a | 0.991 (0.964-1.019) | 0.990 (0.958-1.023) | 0.989 (0.940-1.041) |
| **Model 2** b | 0.986 (0.959-1.014) | 0.978 (0.946-1.012) | 0.994 (0.944-1.047) |
| Model 3 c | 0.982 (0.955-1.010) | 0.973 (0.941-1.007) | 0.992 (0.942-1.045) |
| Red meat (10g/day) | Model 1 a | 1.008 (0.998-1.019) | 1.010 (0.997-1.023) | 1.007 (0.990-1.023) |
| **Model 2** b | 1.005 (0.995-1.016) | 1.009 (0.997-1.022) | 0.999 (0.983-1.015) |
| Model 3 c | 1.001 (0.991-1.011) | 1.004 (0.992-1.017) | 0.996 (0.980-1.013) |
| Processed meat (10g/day) | Model 1 a | 1.016 (1.002-1.030) * | 1.019 (1.002-1.036) * | 1.013 (0.990-1.036) |
| **Model 2** b | 1.011 (0.998-1.025) | 1.015 (0.998-1.032) | 1.006 (0.983-1.029) |
| Model 3 c | 0.999 (0.983-1.014) | 0.998 (0.979-1.017) | 0.999 (0.974-1.026) |
| Sweet drinks (100g/day) | Model 1 a | 1.063 (1.025-1.103) * | 1.105 (1.056-1.158) ** | 0.991 (0.934-1.052) |
| **Model 2** b | 1.041 (1.003-1.081) * | 1.075 (1.026-1.126) * | 0.978 (0.919-1.042) |
| Model 3 c | 1.025 (0.985-1.066) | 1.054 (1.003-1.107) * | 0.969 (0.909-1.033) |
| Ultra-processed food (10%g/day) | Model 1 a | 1.176 (1.131-1.224) ** | 1.176 (1.122-1.231) ** | 1.173 (1.087-1.266) ** |
| **Model 2** b | 1.135 (1.090-1.181) ** | 1.125 (1.074-1.178) ** | 1.149 (1.063-1.242) ** |
| Model 3 c | 1.120 (1.074-1.168) ** | 1.103 (1.051-1.159) ** | 1.145 (1.056-1.242) * |

* p-value <0.05, ** p-value <0.001

1. Model 1: Dietary exposure adjusted by energy intake + Sex (*women, men*) + Age (*continuous*) + Education (*no high school diploma, high school, university level*)
2. **Model 2**: Model 1 + Smoking status (*non-smoker, occasional, former, permanent*) + Physical activity (*low, moderate, high, missing*) + Prevalent cardiovascular disease (*no, yes*) + Residence area (*rural, urban, outside France*) + Occupational category (*never employed/other activity, self-employed, employee, intermediate profession, managerial staff*) + Income per unit of consumption *(<1200€, 1200–2300€, 2300–3700€, >3700€, do not want to declare*) + Marital status (*living alone, living with a partner*) + Number of 24h records (*continuous*) + Alcohol (*continuous*)
3. Model 3: Model 2 + sPNNS-GS2 score (*continuous*)

**Table S9. SA-3: Associations from GEE logistic regression models (ORs and 95% CI) between nutrients and elevated depressive symptoms (CES-D ≥23 for women and ≥17 for men) of sensitivity analysis 3 (N=36,618)**

| **Nutrients (unit)** | **Models** | **All (N=36,618)** | **Women (N=28,030** | **Men (N=8,588)** |
| --- | --- | --- | --- | --- |
| Fiber (5g/day) | Model 1 a | 0.957 (0.927-0.988) * | 0.960 (0.921-1.000) | 0.952 (0.905-1.002) |
| **Model 2** b | 0.967 (0.936-1,000) * | 0.962 (0.922-1.003) | 0.978 (0.927-1.032) |
| Model 3 c | 0.996 (0.959-1.034) | 1.001 (0.955-1.050) | 0.991 (0.931-1.055) |
| Calcium (100mg/day) | Model 1 a | 1.000 (0.985-1.015) | 1.002 (0.984-1.021) | 0.995 (0.969-1.023) |
| **Model 2** b | 1.003 (0.988-1.019) | 1.002 (0.984-1.020) | 1.007 (0.979-1.035) |
| Model 3 c | 1.004 (0.989-1.020) | 1.003 (0.985-1.022) | 1.007 (0.979-1.035) |
| Omega 3 (100mg/day) | Model 1 a | 0.992 (0.980-1.004) | 0.990 (0.975-1.006) | 0.995 (0.977-1.014) |
| **Model 2** b | 0.994 (0.982-1.005) | 0.994 (0.979-1.009) | 0.995 (0.977-1.013) |
| Model 3 c | 0.995 (0.984-1.007) | 0.996 (0.981-1.011) | 0.995 (0.977-1.014) |
| PUFA (1%kcal/day) | Model 1 a | 1.009 (0.990-1.030) | 1.008 (0.984-1.032) | 1.014 (0.979-1.050) |
| **Model 2** b | 1.004 (0.984-1.024) | 1.003 (0.979-1.027) | 1.006 (0.971-1.043) |
| Model 3 c | 1.008 (0.988-1.028) | 1.008 (0.984-1.032) | 1.009 (0.974-1.046) |
| Sodium (100mg/day) | Model 1 a | 0.995 (0.989-1.001) | 0.997 (0.990-1.004) | 0.992 (0.982-1.001) |
| **Model 2** b | 0.995 (0.989-1.000) | 0.997 (0.990-1.005) | 0.991 (0.988-1.000) |
| Model 3 c | 0.990 (0.983-0.996) * | 0.992 (0.984-0.999) * | 0.987 (0.977-0.996) * |

* p-value <0.05, ** p-value <0.001

1. Model 1: Dietary exposure adjusted by energy intake + Sex (*women, men*) + Age (*continuous*) + Education (*no high school diploma, high school, university level*)
2. **Model 2**: Model 1 + Smoking status (*non-smoker, occasional, former, permanent*) + Physical activity (*low, moderate, high, missing*) + Prevalent cardiovascular disease (*no, yes*) + Residence area (*rural, urban, outside France*) + Occupational category (*never employed/other activity, self-employed, employee, intermediate profession, managerial staff*) + Income per unit of consumption *(<1200€, 1200–2300€, 2300–3700€, >3700€, do not want to declare*) + Marital status (*living alone, living with a partner*) + Number of 24h records (*continuous*) + Alcohol (*continuous*)
3. Model 3: Model 2 + sPNNS-GS2 score (*continuous*)

**Table S10. SA-4: Associations from GEE logistic regression models (ORs and 95% CI) between food groups and elevated depressive symptoms (CES-D ≥19 for women and men) of sensitivity analysis 4 (N=40,658)**

| **Food groups (unit)** | **Models** | **All (N=40,658)** | **Women (N=30,798)** | **Men (N=9,860)** |
| --- | --- | --- | --- | --- |
| Fruits (100g/day) | Model 1 a | 0.946 (0.928-0.965) ** | 0.942 (0.921-0.964) ** | 0.958 (0.923-0.994) * |
| **Model 2** b | 0.960 (0.941-0.979) ** | 0.956 (0.935-0.978) ** | 0.966 (0.930-1.004) |
| Model 3 c | 0.972 (0.952-0.993) * | 0.972 (0.949-0.996) * | 0.969 (0.929-1.010) |
| Vegetables (100g/day) | Model 1 a | 0.909 (0.885-0.934) ** | 0.913 (0.884-0.942) ** | 0.893 (0.847-0.942) ** |
| **Model 2** b | 0.921 (0.897-0.946) ** | 0.927 (0.899-0.956) ** | 0.895 (0.849-0.944) ** |
| Model 3 c | 0.931 (0.905-0.957) ** | 0.940 (0.910-0.970) ** | 0.893 (0.845-0.944) ** |
| Legumes (10g/day) | Model 1 a | 0.988 (0.976-1.000) * | 0.989 (0.975-1.003) | 0.984 (0.963-1.006) |
| **Model 2** b | 0.985 (0.974-0.997) * | 0.986 (0.973-1.000) | 0.982 (0.960-1.004) |
| Model 3 c | 0.990 (0.978-1.001) | 0.992 (0.979-1.006) | 0.984 (0.962-1.006) |
| Whole grains (10g/day) | Model 1 a | 0.994 (0.988-1.000) * | 0.995 (0.988-1.002) | 0.991 (0.981-1.002) |
| **Model 2** b | 0.995 (0.989-1.000) | 0.996 (0.989-1.003) | 0.993 (0.983-1.004) |
| Model 3 c | 0.999 (0.993-1.005) | 1.001 (0.994-1.008) | 0.994 (0.983-1.005) |
| Nuts and seeds (10g/day) | Model 1 a | 0.961 (0.937-0.985) * | 0.961 (0.933-0.990) * | 0.957 (0.916-1.000) * |
| **Model 2** b | 0.967 (0.944-0.991) * | 0.968 (0.941-0.997) * | 0.961 (0.919-1.004) |
| Model 3 c | 0.979 (0.956-1.003) | 0.984 (0.956-1.013) | 0.964 (0.922-1.009) |
| Milk (100g/day) | Model 1 a | 1.008 (0.989-1.027) | 1.005 (0.984-1.027) | 1.018 (0.976-1.063) |
| **Model 2** b | 0.998 (0.979-1.018) | 0.993 (0.972-1.015) | 1.019 (0.975-1.065) |
| Model 3 c | 0.995 (0.975-1.014) | 0.989 (0.968-1.011) | 1.018 (0.974-1.063) |
| Red meat (10g/day) | Model 1 a | 1.011 (1.004-1.018) * | 1.010 (1.002-1.018) * | 1.014 (0.999-1.028) |
| **Model 2** b | 1.010 (1.003-1.017) * | 1.009 (1.001-1.018) * | 1.009 (0.995-1.023) |
| Model 3 c | 1.006 (0.999-1.014) | 1.006 (0.997-1.014) | 1.007 (0.993-1.022) |
| Processed meat (10g/day) | Model 1 a | 1.010 (1.000-1.020) * | 1.012 (1.001-1.023) * | 1.005 (0.986-1.024) |
| **Model 2** b | 1.006 (0.997-1.016) | 1.008 (0.997-1.019) | 1.001 (0.982-1.020) |
| Model 3 c | 0.994 (0.983-1.005) | 0.993 (0.981-1.006) | 0.995 (0.974-1.017) |
| Sweet drinks (100g/day) | Model 1 a | 1.087 (1.058-1.116) ** | 1.091 (1.057-1.126) ** | 1.074 (1.024-1.127) * |
| **Model 2** b | 1.054 (1.027-1.082) ** | 1.053 (1.021-1.087) * | 1.057 (1.007-1.110) * |
| Model 3 c | 1.040 (1.012-1.069) * | 1.036 (1.003-1.070) * | 1.054 (1.003-1.108) * |
| Ultra-processed food (10%g/day) | Model 1 a | 1.216 (1.184-1.249) ** | 1.218 (1.183-1.253) ** | 1.209 (1.135-1.287) ** |
| **Model 2** b | 1.157 (1.126-1.188) ** | 1.158 (1.124-1.192) ** | 1.160 (1.088-1.236) ** |
| Model 3 c | 1.147 (1.116-1.179) ** | 1.145 (1.110-1.180) ** | 1.161 (1.087-1.240) ** |

* p-value <0.05, ** p-value <0.001

1. Model 1: Dietary exposure adjusted by energy intake + Sex (*women, men*) + Age (*continuous*) + Education (*no high school diploma, high school, university level*)
2. **Model 2**: Model 1 + Smoking status (*non-smoker, occasional, former, permanent*) + Physical activity (*low, moderate, high, missing*) + Prevalent cardiovascular disease (*no, yes*) + Residence area (*rural, urban, outside France*) + Occupational category (*never employed/other activity, self-employed, employee, intermediate profession, managerial staff*) + Income per unit of consumption *(<1200€, 1200–2300€, 2300–3700€, >3700€, do not want to declare*) + Marital status (*living alone, living with a partner*) + Number of 24h records (*continuous*) + Alcohol (*continuous*)
3. Model 3: Model 2 + sPNNS-GS2 score (*continuous*)

**Table S11. SA-4: Associations from GEE logistic regression models (ORs and 95% CI) between nutrients and elevated depressive symptoms (CES-D ≥19 for women and men) of sensitivity analysis 4 (N=40,658)**

| **Nutrients (unit)** | **Models** | **All (N=40,658)** | **Women (N=30,798)** | **Men (N=9,860)** |
| --- | --- | --- | --- | --- |
| Fiber (5g/day) | Model 1 a | 0.944 (0.922-0.965) ** | 0.945 (0.920-0.970) ** | 0.940 (0.900-0.981) * |
| **Model 2** b | 0.946 (0.924-0.968) ** | 0.949 (0.923-0.975) ** | 0.936 (0.893-0.980) * |
| Model 3 c | 0.961 (0.935-0.988) * | 0.972 (0.942-1.003) | 0.928 (0.878-0.980) * |
| Calcium (100mg/day) | Model 1 a | 1.001 (0.991-1.012) | 1.002 (0.990-1.014) | 0.998 (0.974-1.022) |
| **Model 2** b | 1.003 (0.992-1.014) | 1.004 (0.992-1.015) | 1.002 (0.978-1.026) |
| Model 3 c | 1.004 (0.993-1.015) | 1.005 (0.993-1.017) | 1.002 (0.978-1.026) |
| Omega 3 (100mg/day) | Model 1 a | 0.990 (0.982-0.999) * | 0.987 (0.978-0.997) * | 0.999 (0.981-1.017) |
| **Model 2** b | 0.993 (0.985-1.001) | 0.991 (0.982-1.000) | 0.997 (0.979-1.015) |
| Model 3 c | 0.994 (0.986-1.003) | 0.993 (0.984-1.002) | 0.998 (0.980-1.016) |
| PUFA (1%kcal/day) | Model 1 a | 1.002 (0.988-1.016) | 1.004 (0.988-1.020) | 0.989 (0.959-1.020) |
| **Model 2** b | 0.994 (0.980-1.008) | 0.998 (0.983-1.014) | 0.975 (0.945-1.006) |
| Model 3 c | 0.997 (0.983-1.011) | 1.002 (0.986-1.017) | 0.976 (0.946-1.008) |
| Sodium (100mg/day) | Model 1 a | 0.995 (0.991-0.999) * | 0.995 (0.990-1.000) * | 0.997 (0.988-1.005) |
| **Model 2** b | 0.996 (0.992-1.000) | 0.996 (0.992-1.001) | 0.995 (0.987-1.003) |
| Model 3 c | 0.992 (0.987-0.996) ** | 0.992 (0.986-0.997) * | 0.992 (0.984-1.001) |

* p-value <0.05, ** p-value <0.001

1. Model 1: Dietary exposure adjusted by energy intake + Sex (*women, men*) + Age (*continuous*) + Education (*no high school diploma, high school, university level*)
2. **Model 2**: Model 1 + Smoking status (*non-smoker, occasional, former, permanent*) + Physical activity (*low, moderate, high, missing*) + Prevalent cardiovascular disease (*no, yes*) + Residence area (*rural, urban, outside France*) + Occupational category (*never employed/other activity, self-employed, employee, intermediate profession, managerial staff*) + Income per unit of consumption *(<1200€, 1200–2300€, 2300–3700€, >3700€, do not want to declare*) + Marital status (*living alone, living with a partner*) + Number of 24h records (*continuous*) + Alcohol (*continuous*)
3. Model 3: Model 2 + sPNNS-GS2 score (*continuous*)

**Table S12. SA-5: Associations from GEE logistic regression Model 2 (ORs and 95% CI) between groups of dietary exposures and elevated depressive symptoms (CES-D ≥23 for women and ≥17 for men), mutually adjusting for components within each pool of dietary variables (N=40,658)**

| **Model 2** | **All (N=40,658)** | **Women (N=30,798)** | **Men (N=9,860)** |
| --- | --- | --- | --- |
| **Food groups (unit)** a | | | |
| Fruits (100g/day) | 0.989 (0.966-1.012) | 0.976 (0.947-1.006) | 1.001 (0.966-1.036) |
| Vegetables (100g/day) | 0.927 (0.897-0.958) ** | 0.935 (0.895-0.976) * | 0.916 (0.872-0.962) ** |
| Legumes (10g/day) | 0.996 (0.983-1.009) | 0.996 (0.979-1.013) | 0.997 (0.978-1.017) |
| Whole grains (10g/day) | 1.002 (0.995-1.008) | 1.004 (0.995-1.012) | 1.000 (0.990-1.010) |
| Nuts and seeds (10g/day) | 0.990 (0.964-1.017) | 0.993 (0.958-1.030) | 0.985 (0.946-1.025) |
| Milk (100g/day) | 0.989 (0.968-1.012) | 0.988 (0.961-1.015) | 0.990 (0.952-1.030) |
| Red meat (10g/day) | 1.007 (0.998-1.015) | 1.007 (0.997-1.018) | 1.005 (0.992-1.018) |
| Processed meat (10g/day) | 1.004 (0.993-1.015) | 1.009 (0.995-1.023) | 0.998 (0.981-1.016) |
| Sweet drinks (100g/day) | 1.028 (0.998-1.059) | 1.038 (1.000-1.078) | 1.016 (0.967-1.066) |
| **Food groups + UPF** **(unit)** b | | | |
| Fruits (100g/day) | 1.009 (0.987-1.033) | 0.998 (0.968-1.029) | 1.020 (0.985-1.057) |
| Vegetables (100g/day) | 0.934 (0.904-0.965) ** | 0.941 (0.902-0.982) * | 0.922 (0.877-0.968) * |
| Legumes (10g/day) | 0.995 (0.982-1.007) | 0.995 (0.978-1.012) | 0.996 (0.977-1.015) |
| Whole grains (10g/day) | 1.003 (0.996-1.009) | 1.005 (0.996-1.014) | 1.001 (0.991-1.011) |
| Nuts and seeds (10g/day) | 0.993 (0.967-1.020) | 0.997 (0.961-1.033) | 0.986 (0.948-1.027) |
| Milk (100g/day) | 0.993 (0.971-1.016) | 0.991 (0.965-1.018) | 0.994 (0.956-1.034) |
| Red meat (10g/day) | 1.009 (1.000-1.017) * | 1.009 (0.999-1.020) | 1.007 (0.994-1.020) |
| Processed meat (10g/day) | 1.001 (0.990-1.012) | 1.005 (0.992-1.019) | 0.995 (0.978-1.013) |
| Sweet drinks (100g/day) | 0.969 (0.938-1.002) | 0.976 (0.937-1.017) | 0.961 (0.909-1.016) |
| Ultra-processed food (10%g/day) | 1.164 (1.124-1.204) ** | 1.156 (1.111-1.203) ** | 1.175 (1.099-1.257) ** |
| **Nutrients (unit)** c | | | |
| Fiber (5g/day) | 0.952 (0.927-0.978) ** | 0.944 (0.912-0.978) * | 0.960 (0.920-1.001) |
| Calcium (100mg/day) | 1.006 (0.993-1.018) | 1.011 (0.995-1.026) | 0.999 (0.977-1.021) |
| Omega 3 (100mg/day) | 0.995 (0.986-1.004) | 0.991 (0.980-1.003) | 0.999 (0.984-1.015) |
| PUFA (1%kcal/day) | 1.006 (0.989-1.023) | 1.014 (0.993-1.035) | 0.991 (0.962-1.020) |
| Sodium (100mg/day) | 0.996 (0.992-1.001) | 0.997 (0.991-1.003) | 0.996 (0.989-1.003) |

* p-value <0.05, ** p-value <0.001

1. Model 2: **Fruits + Vegetables + Legumes + Whole grains + Nuts and seeds + Milk + Red meat + Processed meat + Sweet drinks** + Sex (*women, men*) + Age (*continuous*) + Education (*no high school diploma, high school, university level*) + Smoking status (*non-smoker, occasional, former, permanent*) + Physical activity (*low, moderate, high, missing*) + Prevalent cardiovascular disease (*no, yes*) + Residence area (*rural, urban, outside France*) + Occupational category (*never employed/other activity, self-employed, employee, intermediate profession, managerial staff*) + Income per unit of consumption *(<1200€, 1200–2300€, 2300–3700€, >3700€, do not want to declare*) + Marital status (*living alone, living with a partner*) + Number of 24h records (*continuous*) + Alcohol (*continuous*)
2. Model 2: **Fruits + Vegetables + Legumes + Whole grains + Nuts and seeds + Milk + Red meat + Processed meat + Sweet drinks + Ultra-processed food** + Sex (*women, men*) + Age (*continuous*) + Education (*no high school diploma, high school, university level*) + Smoking status (*non-smoker, occasional, former, permanent*) + Physical activity (*low, moderate, high, missing*) + Prevalent cardiovascular disease (*no, yes*) + Residence area (*rural, urban, outside France*) + Occupational category (*never employed/other activity, self-employed, employee, intermediate profession, managerial staff*) + Income per unit of consumption *(<1200€, 1200–2300€, 2300–3700€, >3700€, do not want to declare*) + Marital status (*living alone, living with a partner*) + Number of 24h records (*continuous*) + Alcohol (*continuous*)
3. Model 2: **Fiber + Calcium + Omega 3 + PUFA + Sodium** + Sex (*women, men*) + Age (*continuous*) + Education (*no high school diploma, high school, university level*) + Smoking status (*non-smoker, occasional, former, permanent*) + Physical activity (*low, moderate, high, missing*) + Prevalent cardiovascular disease (*no, yes*) + Residence area (*rural, urban, outside France*) + Occupational category (*never employed/other activity, self-employed, employee, intermediate profession, managerial staff*) + Income per unit of consumption *(<1200€, 1200–2300€, 2300–3700€, >3700€, do not want to declare*) + Marital status (*living alone, living with a partner*) + Number of 24h records (*continuous*) + Alcohol (*continuous*)

**Table S13. SA-6: Associations from GEE logistic regression Model 3 (ORs and 95% CI) between dietary exposures and elevated depressive symptoms excluding the specific component from the sPNNS-GS2 score (N=40,658)**

| **Food groups (unit)** | **Models** | **All (N=40,658)** | **Women (N=30,798)** | **Men (N=9,860)** |
| --- | --- | --- | --- | --- |
| Fruits (100mg/day) | Model 3 a | 0.983 (0.960-1.006) | 0.977 (0.947-1.007) | 0.988 (0.953-1.023) |
| Model 4 b | 0.975 (0.953-0.996) * | 0.966 (0.938-0.995) * | 0.983 (0.949-1.017) |
| Vegetables (100mg/day) | Model 3 a | 0.927 (0.898-0.958) ** | 0.936 (0.897-0.977) * | 0.913 (0.869-0.958) ** |
| Model 4 b | 0.922 (0.893-0.951) ** | 0.928 (0.890-0.967) ** | 0.911 (0.869-0.955) ** |
| Red Meat (10mg/day) | Model 3 a | 1.006 (0.998-1.014) | 1.006 (0.995-1.016) | 1.006 (0.993-1.019) |
| Model 4 b | 1.008 (1.000-1.016) * | 1.009 (0.998-1.019) | 1.007 (0.995-1.020) |

* p-value <0.05, ** p-value <0.001

1. Model 3: Dietary exposure adjusted by energy intake + Sex (*women, men*) + Age (*continuous*) + Education (*no high school diploma, high school, university level*) + Smoking status (*non-smoker, occasional, former, permanent*) + Physical activity (*low, moderate, high, missing*) + Prevalent cardiovascular disease (*no, yes*) + Residence area (*rural, urban, outside France*) + Occupational category (*never employed/other activity, self-employed, employee, intermediate profession, managerial staff*) + Income per unit of consumption *(<1200€, 1200–2300€, 2300–3700€, >3700€, do not want to declare*) + Marital status (*living alone, living with a partner*) + Number of 24h records (*continuous*) + Alcohol (*continuous*) + sPNNS-GS2 score (*continuous*)
2. Model 4: Model 3 with sPNNS-GS2 excluding the specific dietary exposure (fruits, vegetables, and red meat) from the total score

**Supplemental Text S1. Description of the sPNNS-GS2 main dietary components and recommendations**

The simplified version of the PNNS-GS2 (sPNNSGS2) includes only principal recommendations of the original PNNS-GS2, as described in the NutriNet-Santé study by Chaltiel et al. (2019) (**33**).

| **Dietary components** | **Recommendation** |
| --- | --- |
| Fruits and vegetables | At least 5 servings/d, with 1 maximum as juice and 1 maximum as dried |
| Nuts | A handful/d |
| Legumes | At least 2 servings/week |
| Whole-grain food | Every day |
| Milk and dairy products | 2 servings/d |
| Red meat | Limit consumption |
| Processed meat | Limit consumption |
| Fish and seafood | 2 servings/week |
| Added fat | Avoid overeating |
| Sugary foods | Limit consumption |
| Sweet-tasting beverages | Limit consumption |
| Alcoholic beverages | Limit consumption |
| Salt | Limit consumption |

**Supplemental Text S2. Definitions and examples of ultra-processed foods according to the NOVA classification in the NutriNet-Santé study**

The methodology used to classify foods according to their degree of processing has been previously described in the NutriNet-Santé study by Beslay M and Srour B et al. (2020) (**35**). All food and beverage items of the NutriNet-Santé composition table (n=3,500) were categorized by a team of three trained dieticians into one of the four NOVA groups, a food classification system based on the extent and purpose of industrial food processing (**34**). The whole classification was then reviewed by a committee composed of the three dietitians and five researchers, specialists in nutritional epidemiology. In case of uncertainty for a given food/beverage item, a consensus was reached among researchers based on the percentage of home-made and artisanal foods versus industrial brands reported by the participants. Products in the “ultra-processed foods” group of the NOVA classification undergo industrial processes that include for instance hydrogenation, hydrolysis, extruding, moulding, reshaping, and pre-processing by frying. Flavouring agents, colours, emulsifiers, humectants, non-sugar sweeteners and other cosmetic additives are often added to these products to imitate sensorial properties of unprocessed or minimally processed foods and their culinary preparations. The UPFs group is defined by opposition to the other NOVA groups: “unprocessed or minimally processed foods” (fresh, dried, grounded, chilled, frozen, pasteurized or fermented staple foods such as fruits, vegetables, pulses, rice, pasta, eggs, meat, fish or milk), “processed culinary ingredients” (salt, vegetable oils, butter, sugar and other substances extracted from foods and used in kitchens to transform unprocessed or minimally processed foods into culinary preparations) and “processed foods” (canned vegetables with added salt, sugar-coated dry fruits, meat products only preserved by salting, cheeses and freshly made unpackaged breads, and other products manufactured with the addition of salt, sugar or other substances of the “processed culinary ingredients” group). As previously described (**37**), home-made and artisanal food preparations were identified and decomposed using standardized recipes, and the NOVA classification was applied to their ingredients. Examples of such products as well as examples of distinctions between ultra-processed products and products from other NOVA categories are provided below:

Examples of typical ultra-processed foods according to the NOVA classification: *Poultry and fish nuggets and sticks and other reconstituted meat products transformed with addition of preservatives other than salt (e.g nitrites); instant noodles and dehydrated soups; carbonated diet and regular sodas; chocolate with emulsifiers, chewing gums and candies with dyes (confectionery); margarine; instant desserts; most breakfast ‘cereals’, ‘energy’ bars; ‘energy’ drinks; flavoured milk drinks; sweet desserts made from fruit with added sugars, artificial flavours and texturizing agents; cooked seasoned vegetables with ready-made sauces; vegetable patties (meat substitutes) containing food additives; ‘health’ and ‘slimming’ products such as powdered or ‘fortified’ meal and dish substitutes.*

For instance, salted-only red or white meats are considered as “processed foods” whereas smoked or cured meats with added nitrites and conservatives, such as sausages and ham are classified as “ultra-processed foods”. Similarly, canned salted vegetables are considered as “processed foods” whereas industrial cooked or fried seasoned vegetables, marinated in industrial sauces with added flavourings are considered as “ultra-processed foods”. Flavoured breakfast cereals with added emulsifiers, texturizing agents and/or colorants were included in the ultra-processed food group. Homemade granola, oatmeal, rye and barley flakes without additives were not considered as ultra-processed. Regarding soups, canned liquid soups with added salts, herbs and spices are considered as “processed foods” while instant dry soup mixes are considered as “ultra-processed foods”. Example of list of ingredients for an industrial Chicken and Leek flavour soup considered as “ultra-processed” according to the NOVA classification: *“Dried Glucose Syrup, Potato Starch, Flavourings, Salt, Leek Powder (3.6%), Dried Leek (3.5%), Onion Powder, Dried Carrot, Palm Oil, Dried Chicken (0.7%), Garlic Powder, Dried Parsley, Colour [Curcumin (contains MILK)], Ground Black Pepper, MILK Protein, Stabilisers (Dipotassium Phosphate, Trisodium Citrate)”*.

**Examples of food products considered as ultra-processed according to the NOVA classification**

| **Ultra-processed food group** | **Examples of foods** |
| --- | --- |
| Beverages | Sugary drinks (e.g. regular sodas, sugary fruit-based and flavoured beverages, industrial chocolate powder beverages, energy drinks, flavoured waters); artificially sweetened beverages (e.g. diet sodas, artificially sweetened ice teas) |
| Dairy products | Flavoured or artificially sweetened yoghurts; products such as dairy desserts, cream cheese, milkshakes, dairy beverages, flavoured milk with one or more texturizer, emulsifier, colorant, or other cosmetic additives |
| Fats and sauces | Sauces and dressings (salad dressing, mayonnaise, ketchup, béchamel, and other dressings) containing emulsifiers, texturizers, flavour enhancers or other additives |
| Fruits and vegetables | Instant powder soups; reconstituted vegetarian/soy steaks with additives; flavoured and artificially sweetened fruit compotes; vegan nuggets |
| Meat, fish, and eggs | Processed meat with added nitrites; chicken nuggets; fish fingers; industrial ‘cordon bleu’ chicken with wheat dextrose, emulsifiers, preservatives; surimi-crab sticks |
| Starchy foods and cereals | Flavoured breakfast cereals with added emulsifiers, texturizing agents and/or colorants; industrial pre-baked breads and buns with added dextrose, preservatives, or emulsifiers. |
| Sugary products | Industrially packed cookies, cakes, chocolate/wafer bars, and candies manufactured with glucose syrup, modified starch, hydrogenated oils, colours, flavours, emulsifiers. |
| Salty snacks | Chips, crisps, and crackers made with other ingredients than potatoes, oil and salt such as maltodextrin, flavours, dyes, emulsifiers, flavour enhancers |
